# Supplementary material for: Sizing blue carbon risks and benefits from bivalve aquaculture
Source: Research Square preprint supplement (doi:10.21203/rs.3.rs-7304695/v1), 2025-09-03
Supplement: Supplementary file 1 [file 802c396100b1bba01c7f9f6a.docx]

**Sizing blue carbon risks and benefits from bivalve aquaculture**

***Supplementary Information***

**Supplementary Table 1.** Global summary statistics of the intersection of bivalve aquaculture with BCEs.

| **Carbon habitat** | **Total global extent of habitat (ha)** | **N countries where bivalve aqua overlaps** | **Total global area of overlap of modelled farm**  **footprint (ha)** **and (N of modelled aquaculture farms**  **with overlap)** | | | |
| --- | --- | --- | --- | --- | --- | --- |
|  |  |  | **High yield** | **Low yield** | **High yield** | **Low yield** |
| Mangrove | 14,622,352 | 15 | 174  (n = 339) | 24,758  (n = 3,667) | 0.00% | 0.17% |
| Seagrass | 30,994,241 | 29 | 3,353  (n = 2,486) | 87,202  (n = 3,869) | 0.01% | 0.28% |
| Tidal flats | 13,203,746 | 37 | 17,449  (n = 21,145) | 304,520  (n = 43,428) | 0.13% | 2.31% |
| Tidal marshes | 4,459,875 | 18 | 1,118  (n = 1,622) | 30,740  (n = 7,058) | 0.03% | 0.69% |
| **Total** | **63,280,214** | **45** | **22,093**  **(n = 23,598)** | **447,220**  **(n = 46,642)** | **0.03%** | **0.71%** |


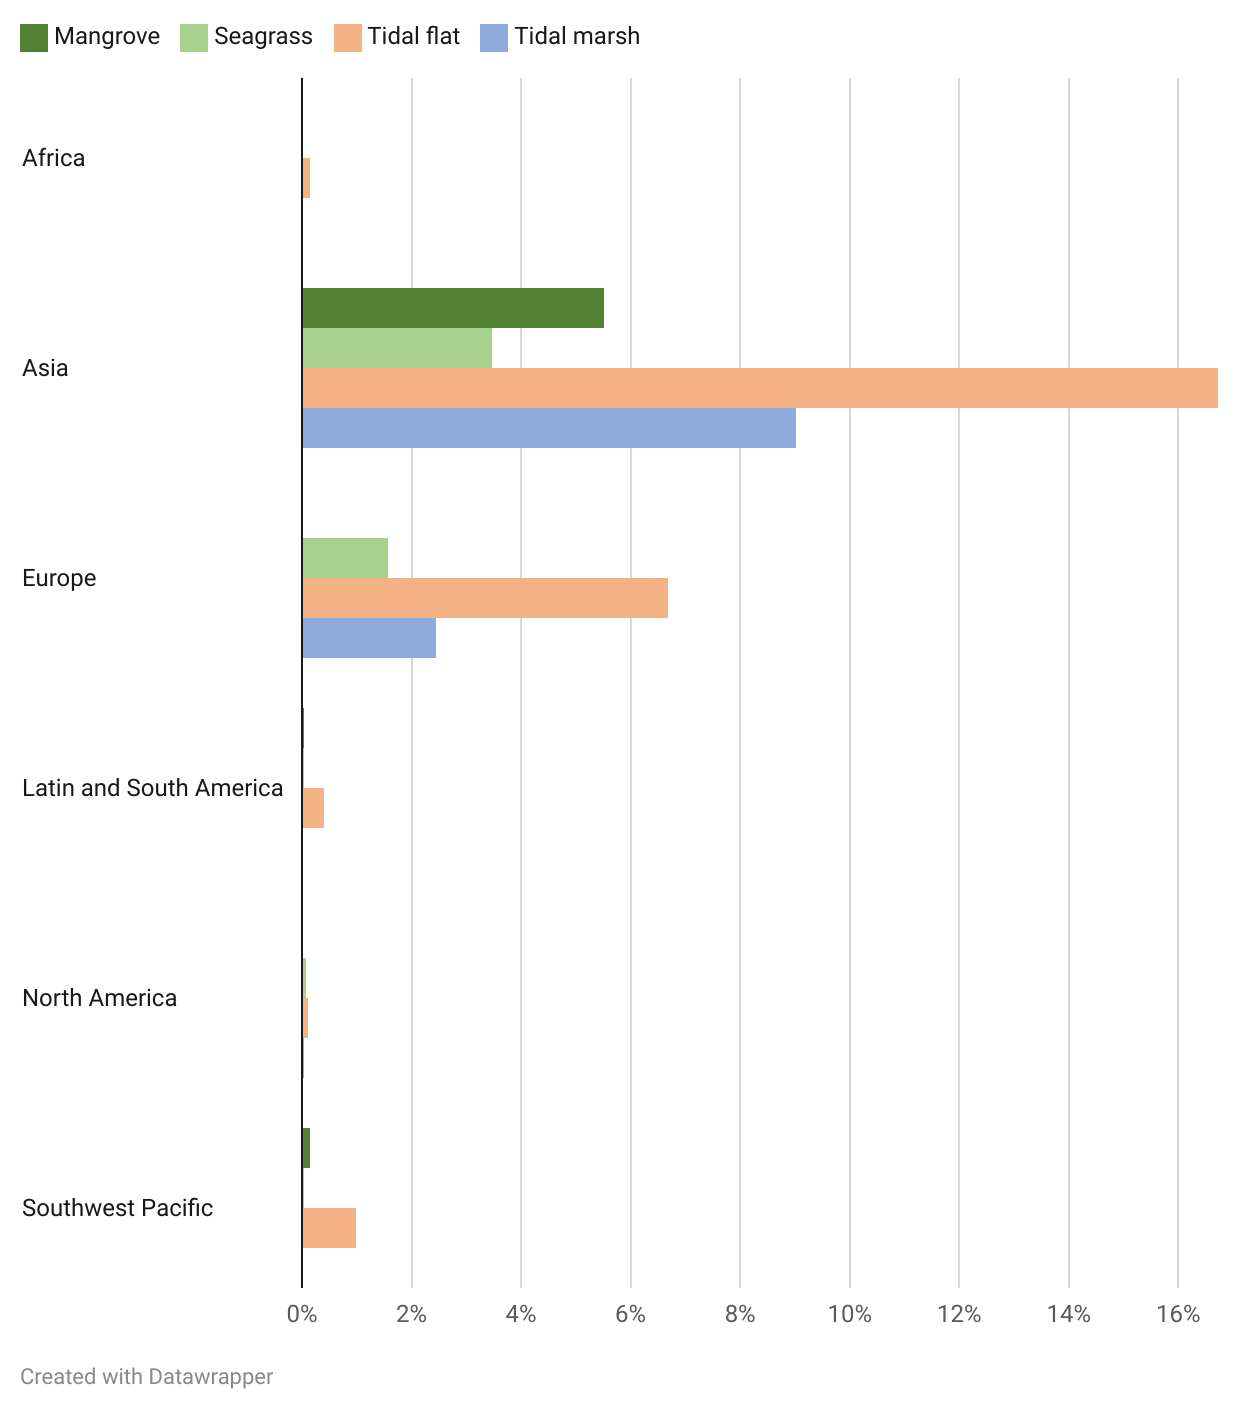


**Supplementary Figure 1**. Proportion of interaction of modelled farm footprint with key coastal carbon habitats, across all regions with bivalve aquaculture and carbon habitats.

**Supplementary Table 2.** Countries that have bivalve aquaculture overlapping with carbon habitats and the percentage of habitat this overlap represents.

| Country | Mangrove | Seagrass | Tidal Flats | Tidal Marsh |
| --- | --- | --- | --- | --- |
| Australia | 0.004% | 0.004% | 0.022% | x |
| Belgium | x | x | 1.350% | x |
| Brazil | 0.004% | x | 0.021% | x |
| Brunei | x | x | 0.270% | x |
| Cambodia | 0.057% | x | 1.727% | x |
| Canada | x | 0.011% | 0.014% | 0.006% |
| Chile | x | x | 0.195% | x |
| China | 4.565% | 1.372% | 5.384% | 3.063% |
| Croatia | x | 0.012% | x | x |
| Cuba | 0.006% | 0.012% | x | x |
| Denmark | x | 0.021% | x | x |
| France | x | 0.041% | 1.311% | 0.890% |
| Germany | x | 0.167% | 0.105% | 0.204% |
| Greece | x | 0.021% | x | x |
| India | 0.008% | 0.018% | 0.038% | 0.117% |
| Indonesia | 0.010% | 0.038% | 0.067% | x |
| Ireland | x | 0.542% | 0.688% | 0.103% |
| Italy | x | 0.039% | 0.074% | 0.088% |
| Japan | x | 0.784% | 1.059% | 0.105% |
| Malaysia | 0.009% | 0.047% | 0.133% | x |
| Mexico | 0.003% | 0.003% | 0.034% | x |
| Netherlands | x | x | 0.930% | 0.977% |
| New Zealand | 0.138% | x | 0.915% | x |
| North Korea | x | x | 0.691% | 2.233% |
| Norway | x | 0.005% | x | x |
| Peru | x | x | 0.225% | x |
| Philippines | 0.018% | 0.051% | 0.186% | x |
| Portugal | x | x | 0.267% | 0.004% |
| Russia | x | 0.018% | x | 0.003% |
| Singapore | x | 0.011% | x | x |
| South Africa | x | x | 0.128% | x |
| South Korea | x | x | 2.728% | 4.390% |
| Spain | x | 0.560% | 2.335% | 0.076% |
| Taiwan | 0.529% | 0.130% | 1.817% | x |
| Thailand | 0.132% | 0.899% | 1.596% | x |
| United Kingdom | x | 0.002% | 0.045% | 0.064% |
| United States | x | 0.030% | 0.040% | 0.026% |
| Vietnam | 0.166% | x | 0.794% | x |

**Supplementary Table 3.** Indications of aquaculture development interest for countries with spatial extent of carbon habitats but no current production of bivalves.

| **Country** | **Primary development mechanism** | **Bivalve aquaculture development estimate** | **References** | **Data source** |
| --- | --- | --- | --- | --- |
| Saudi Arabia | National aquaculture policy | Moderate | Ministry of Environment Water and Agriculture. (2018). National Aquaculture Policies and Practices. 2nd ed. Kingdom of Saudi Arabia | <https://www.mewa.gov.sa/en/InformationCenter/DocsCenter/RulesLibrary/Docs/National%20Aquaculture%20Policies%20and%20Practices.pdf#search=aquaculture> |
| Guinea-Bissau | Strategic plan for socioeconomic development, blue economy strategy | Low | REPÚBLICA DA GUINÉ-BISSAU. (2015). Guiné-Bissau 2025 Plano Estratégico e Operacional 2015-2020 “Terra Ranka”. | <https://faolex.fao.org/docs/pdf/gbs176530.pdf> |
| Ministry of Economy, Planning and Regional Integration. 2024. National Blue Economy Strategy and Investment Plan for Guinea Bissau 2024-2030. | <https://www.undp.org/guinea-bissau/publications/guinea-bissaus-blue-economy-strategy> |
| Nigeria | National aquaculture strategy, National agricultural policy | Moderate | Federal Ministry of Agriculture and Rural Development. (2008). Nigeria National Aquaculture Strategy. | <https://faolex.fao.org/docs/pdf/nig189027.pdf> |
| Federal Ministry of Agriculture and Rural Development. (2022). National Agricultural Technology and Innovation Policy (NATIP) 2022-2027 | <https://faolex.fao.org/docs/pdf/nig214137.pdf> |
| Guinea | Aquaculture development policy | Moderate | MINISTERE DE LA PECHE ET DE L’AQUACULTURE. 2009. LETTRE DE POLITIQUE DE DEVELOPPEMENT DE LA PECHE ET DE L’AQUACULTURE (LPDPA) | <https://faolex.fao.org/docs/pdf/gui158098.pdf> |
| Papua New Guinea | Fisheries strategic plan, aquaculture roadmap | High | Fisheries Strategic Plan 2021-2030 : capitalising the fisheries sector for an inclusive and sustainable broad-based growth. - - [Port Moresby] : Papua New Guinea. National Fisheries Authority, 2021. | <https://faolex.fao.org/docs/pdf/png205423.pdf> |
| Government of Papua New Guinea. 2017. A Roadmap for coastal fisheries and marine aquaculture for Papua New Guinea: 2017–2026. | <https://faolex.fao.org/docs/pdf/png205446.pdf> |
| Myanmar | National aquaculture development plan | Moderate | Ministry of Agriculture, Livestock, and Irrigation. 2020. National Aquaculture Development Plan 2020. | <http://www.dof-myanmar-fic.org/Multimedia/Books/57.%20NADP-ENG.pdf> |
| Madagascar | Aquaculture development policies, aquaculture investment guide | High | Ministry of Fisheries and Blue Economy, Union Europeene, FishGov 2 Project, African Union Interafrican Bureau for Animal Resources. 2023. Aligning Madagascar's Fisheries and Aquaculture Development Policies on the Policy Framework and Reform Strategy for African Fisheries and Aquaculture. | <https://www.mpeb.mg/wp-content/uploads/2024/03/FINAL-REPORT-OF-PFRS-MADAGASCAR-ALIGNMENT-CONSULTANCY-2023-REVISED-ok-2.pdf> |
| Ministry of Fisheries and Blue Economy & Economic Development Board. 2024. Aquaculture Investment Guide in Madagascar: A Promising Investment within Reach | <https://www.mpeb.mg/wp-content/uploads/2024/07/Guide-dinvestissement-Aquaculture_ANG-1.pdf> |
| Nicaragua | Aquaculture development strategy | Moderate | Instituto Nicaraguense de la Pesca y Acuicultura. 2016. Estrategia de Desarrollo del Sector Pesquero y Acuicola en Nicaragua 2017-2021. | <http://www.inpesca.gob.ni/images/Division%20de%20Planificacion/2019/ESTRATEGIA%20DE%20LA%20PESCA%20Y%20ACUICULTURA%202017-2021%20INPESCA.pdf> |
| Bangladesh | Aquaculture development strategy | Moderate | Ministry of Fisheries and Livestock & Food and Agriculture Organization of the United Nations. 2014. National Aquaculture Development Strategy and Action Plan of Bangladesh 2013-2020. | <https://faolex.fao.org/docs/pdf/bgd169471.pdf> |
| Ukraine | National aquaculture policy | Moderate | Law No. 5293-VI "On aquaculture". 2013. | <https://faolex.fao.org/docs/pdf/ukr124989.pdf> |

**Supplementary Table 4.** Global potential impact of bivalve aquaculture on C stocks and sequestration, based on areal extent of interacting bivalve aquaculture farms.

| **BCE or habitat** | **Total global habitat extent mapped (ha)** | **Total global area of overlap of modelled farm footprint (ha)** | **Storage impact of overlapping habitat (Mg C)** | **Sequestration impact of overlapping habitat (Mg C yr-1)** |
| --- | --- | --- | --- | --- |
| Seagrasses | 30,994,241 | 17,863 | 1,975,648 | 21,324 |
| Mangroves | 14,622,352 | 2,227 | 1,057,602 | 3,106 |
| Tidal marshes | 4,459,875 | 6,096 | 1,618,488 | 9,892 |
| Tidal flats | 13,203,746 | 86,555 | 7,469,697 | 113,135 |
| **Total** | **63,280,214** | **112,741** | **12,121,435** | **147,456** |

**Supplementary Table 5.**  Regional potential impact of bivalve aquaculture on C stocks and sequestration, based on spatial extent of interacting bivalve aquaculture farms under two scenarios of growth and aquaculture expansion to 2030.

| **2030 spatial extent under 10% growth scenario** | | | | | | | | | | | | |
| --- | --- | --- | --- | --- | --- | --- | --- | --- | --- | --- | --- | --- |
| **Region** | **Mangrove** | | | **Seagrass** | | | **Tidal flat** | | | **Tidal marsh** | | |
|  | **Total area (ha)** | **Storage impact of overlapping habitat (Mg C)** | **Sequestration impact of overlapping habitat (Mg C yr-1)** | **Total area (ha)** | **Storage impact of overlapping habitat (Mg C)** | **Sequestration impact of overlapping habitat (Mg C yr-1)** | **Total area (ha)** | **Storage impact of overlapping habitat (Mg C)** | **Sequestration impact of overlapping habitat (Mg C yr-1)** | **Total area (ha)** | **Storage impact of overlapping habitat (Mg C)** | **Sequestration impact of overlapping habitat (Mg C yr-1)** |
| **AF** | 0 | 0 | 0 | 0 | 0 | 0 | 30.107 | 2598.234 | 39.35246 | 0 | 0 | 0 |
| **AS** | 2254.087 | 1070466 | 3143.455 | 16348.92 | 1808190 | 19516.52 | 86692.12 | 7481530 | 113314.1 | 5062.299 | 1344040 | 8214.296 |
| **EU** | 0 | 0 | 0 | 2473.416 | 273559.8 | 2952.64 | 6206.409 | 535613.1 | 8112.314 | 1048.124 | 278276.9 | 1700.73 |
| **LA_CA_SA** | 72.182 | 34279.23 | 100.662 | 124.751 | 13797.46 | 148.9215 | 339.922 | 29335.27 | 444.3075 | 0 | 0 | 0 |
| **NA** | 37.928 | 18012.01 | 52.89279 | 532.939 | 58943.05 | 636.1959 | 484.231 | 41789.14 | 632.9319 | 594.66 | 157882.2 | 964.92 |
| **SWP** | 85.866 | 40777.76 | 119.7451 | 169.411 | 18736.86 | 202.2344 | 1457.456 | 125778.5 | 1905.021 | 0 | 0 | 0 |
| **Total** | 2450.063 | 1163535 | 3416.755 | 19649.43 | 2173227 | 23456.51 | 95210.24 | 8216643 | 124448 | 6705.083 | 1780200 | 10879.95 |
|  |  |  |  |  |  |  |  |  |  |  |  |  |
| **2030 spatial extent under 50% growth scenario** | | | | | | | | | | | | |
| **Region** | **Mangrove** | | | **Seagrass** | | | **Tidal flat** | | | **Tidal marsh** | | |
|  | **Total area (ha)** | **Storage impact of overlapping habitat (Mg C)** | **Sequestration impact of overlapping habitat (Mg C yr-1)** | **Total area (ha)** | **Storage impact of overlapping habitat (Mg C)** | **Sequestration impact of overlapping habitat (Mg C yr-1)** | **Total area (ha)** | **Storage impact of overlapping habitat (Mg C)** | **Sequestration impact of overlapping habitat (Mg C yr-1)** | **Total area (ha)** | **Storage impact of overlapping habitat (Mg C)** | **Sequestration impact of overlapping habitat (Mg C yr-1)** |
| **AF** | 0 | 0 | 0 | 0 | 0 | 0 | 41.055 | 3543.047 | 53.66244 | 0 | 0 | 0 |
| **AS** | 3073.755 | 1459726 | 4286.529 | 22293.98 | 2465714 | 26613.43 | 118216.5 | 10202087 | 154519.2 | 6903.135 | 1832782 | 11201.31 |
| **EU** | 0 | 0 | 0 | 3372.84 | 373036.1 | 4026.328 | 8463.285 | 730381.5 | 11062.25 | 1429.26 | 379468.5 | 2319.177 |
| **LA_CA_SA** | 98.43 | 46744.41 | 137.2663 | 170.115 | 18814.72 | 203.0748 | 463.53 | 40002.64 | 605.8739 | 0 | 0 | 0 |
| **NA** | 51.72 | 24561.83 | 72.12653 | 726.735 | 80376.89 | 867.5399 | 660.315 | 56985.18 | 863.0889 | 810.9 | 215294 | 1315.8 |
| **SWP** | 117.09 | 55606.04 | 163.2888 | 231.015 | 25550.26 | 275.7742 | 1987.44 | 171516.1 | 2597.756 | 0 | 0 | 0 |
| **Total** | 3340.995 | 1586639 | 4659.211 | 26794.68 | 2963492 | 31986.15 | 129832.1 | 11204514 | 169701.9 | 9143.295 | 2427545 | 14836.29 |


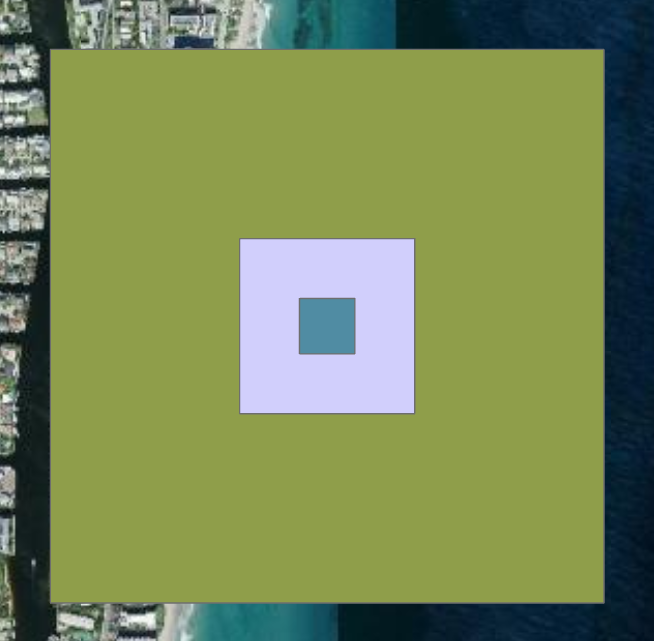


**Supplementary Figure 2.** Example of changes in farm footprint associated with sensitivity in yield, based on low (3.5 t ha-1 yr-1), mean (35 t ha-1 yr-1) and high yield (350 t ha-1 yr-1).

**Supplementary Table 6**. Global habitat datasets and sources utilized in the analyses.

| Data Layer | Year | Reference | Data Source |
| --- | --- | --- | --- |
| Global distribution of seagrasses (version 7.1) | 2021 | UNEP-WCMC, Short FT 2021 | <https://data-gis.unep-wcmc.org/portal/home/item.html?id=aaa46cd3d3d640b2916b8f0a0ffe07cb> |
| Global Mangrove Watch (1996 - 2020) Version 3.0 Dataset | 2020 | Bunting et al. 2020 | <https://zenodo.org/records/6894273> |
| The distribution of global tidal marshes from earth observation data | 2020 | Worthington et al. 2023 | <https://zenodo.org/records/8420753> |
| High-resolution global maps of tidal flat ecosystems. Version 1.2 | 1999 - 2019 | Murray et al. 2022 | <https://www.globalintertidalchange.org/data-viewer> |


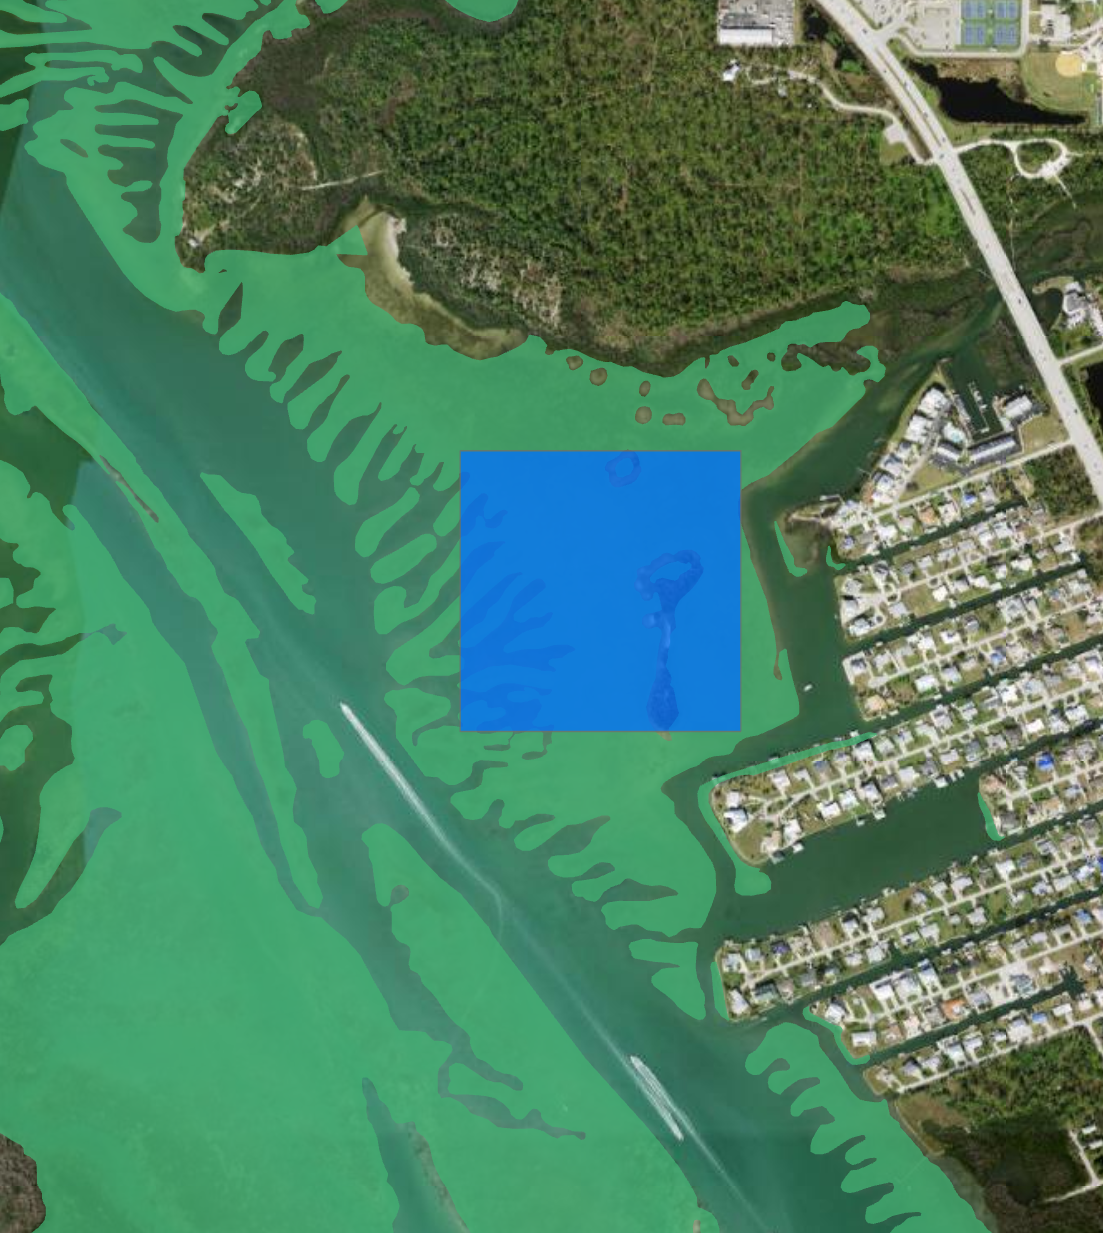


**Supplementary Figure 3.** Example of overlap with seagrass habitat and 4 hectare modeled farm footprint, Western Florida, USA.
